# Supplementary material
Source: PubMed Central journal article supplement (PMC2946769)
Supplement: SD4.pdf [file SD4.pdf]

SUPPLEMENTAL TABLE 1

Organism (*Bartonella* spp.) and highest DNA similarity value compared with fragments in GenBank based on sequenced *gltA* gene from isolated colonies, small mammal blood, flea, and louse DNA samples, Taiwan\*

| Organism        | Group no.             | Sample no.                                                                                            | Organism/similarity value                                     |
|-----------------|-----------------------|-------------------------------------------------------------------------------------------------------|---------------------------------------------------------------|
| Isolated colony | R-ISO-g1 <i>gltA</i>  | R4-2, 6-1, 6-2, 19-1 R19-2, 36-2, 72-1, 72-2                                                          | <i>B. rattimassiliensis</i> /100%                             |
|                 | R-ISO-g2 <i>gltA</i>  | R11-1, 11-2, 75-1 R75-2, 85-1                                                                         | <i>B. elizabethae</i> /96%                                    |
|                 | R-ISO-g3 <i>gltA</i>  | R13-1, 13-2, 14-1 R14-2, 59-1, 59-2                                                                   | <i>B. queenslandensis</i> /99%                                |
|                 | R-ISO-g4 <i>gltA</i>  | R22-1                                                                                                 | <i>B. tribocorum</i> /96%                                     |
|                 | R-ISO-g5 <i>gltA</i>  | R22-2, 37-1, 37-2, 48-1 R48-2, 69-1, 69-2                                                             | <i>B. tribocorum</i> /96%                                     |
|                 | R-ISO-g6 <i>gltA</i>  | R27-1, 27-2, 73-1, 73-2 R82-1, 82-2, 83-1, R83-2, 85-2                                                | <i>B. tribocorum</i> /99%                                     |
|                 | R-ISO-g7 <i>gltA</i>  | R30-1                                                                                                 | <i>B. elizabethae</i> /95%                                    |
|                 | R-ISO-g8 <i>gltA</i>  | R30-2                                                                                                 | <i>B. elizabethae</i> /96%                                    |
|                 | R-ISO-g9 <i>gltA</i>  | R35-1, 35-2, 81-1, 81-2                                                                               | <i>B. tribocorum</i> /99%                                     |
|                 | R-ISO-g10 <i>gltA</i> | R38-1, 38-2                                                                                           | <i>B. queenslandensis</i> /99%                                |
|                 | R-ISO-g11 <i>gltA</i> | R30-1_BAPGM R30-2_BAPGM R35-1_BAPGM<br>R35-2_BAPGM R38-1_BAPGM R38-2_BAPGM                            | <i>B. queenslandensis</i> /99%                                |
|                 | R-ISO-g12 <i>gltA</i> | R59-1_BAPGM R59-2_BAPGM                                                                               | <i>B. queenslandensis</i> /99%                                |
|                 | R-ISO-g13 <i>gltA</i> | R72-1_BAPGM R72-2_BAPGM                                                                               | <i>B. rattimassiliensis</i> /100%                             |
| Animal blood    | RB-g1 <i>gltA</i>     | RB4, 6, 72                                                                                            | <i>B. phoceensis</i> /100%                                    |
|                 | RB-g2 <i>gltA</i>     | RB5                                                                                                   | <i>B. elizabethae</i> /96%                                    |
|                 | RB-g3 <i>gltA</i>     | RB9, 14                                                                                               | <i>B. queenslandensis</i> /99%                                |
|                 | RB-g4 <i>gltA</i>     | RB19                                                                                                  | <i>B. rattimassiliensis</i> /100%                             |
|                 | RB-g5 <i>gltA</i>     | RB30                                                                                                  | <i>B. queenslandensis</i> /99%                                |
|                 | RB-g6 <i>gltA</i>     | RB35                                                                                                  | <i>B. phoceensis</i> /94%                                     |
|                 | RB-g7 <i>gltA</i>     | RB38                                                                                                  | <i>B. queenslandensis</i> /99%                                |
|                 | RB-g8 <i>gltA</i>     | RB64                                                                                                  | <i>B. tribocorum</i> /97%                                     |
|                 | RB-g9 <i>gltA</i>     | RB73, 82                                                                                              | <i>B. tribocorum</i> /99%                                     |
| Fleas           | RF-g1 <i>gltA</i>     | RF4-1, 11-1, 58-1, 58-2 RF58-3, 58-5, 75-5, 82-1<br>RF82-2, 82-3, 82-4, 82-5 RF83-3, 83-4, 85-1, 85-5 | <i>B. tribocorum</i> /99%                                     |
|                 | RF-g2 <i>gltA</i>     | RF4-2, 5-3, 5-4, 5-5 RF11-3, 65-1, 75-3 RF84-1, 84-5                                                  | <i>B. elizabethae</i> /96%                                    |
|                 | RF-g3 <i>gltA</i>     | RF5-1, 38-1                                                                                           | <i>B. elizabethae</i> /96%                                    |
|                 | RF-g4 <i>gltA</i>     | RF5-2                                                                                                 | <i>B. tribocorum</i> /98%                                     |
|                 | RF-g5 <i>gltA</i>     | RF11-2, 19-1, 65-2 RF72-1, 74-3                                                                       | <i>B. elizabethae</i> /96%                                    |
|                 | RF-g6 <i>gltA</i>     | RF33-2, 84-3                                                                                          | <i>Bartonella</i> sp. 1-1C/100%,<br><i>B. rochalimae</i> /99% |
|                 | RF-g7 <i>gltA</i>     | RF58-4                                                                                                | <i>B. tribocorum</i> /99%                                     |
|                 | RF-g8 <i>gltA</i>     | RF63-1, 85-2                                                                                          | <i>B. queenslandensis</i> /99%                                |
|                 | RF-g9 <i>gltA</i>     | RF67-1                                                                                                | <i>B. tribocorum</i> /97%                                     |
|                 | RF-g10 <i>gltA</i>    | RF75-1, 81-1                                                                                          | <i>B. tribocorum</i> /99%                                     |
|                 | RF-g11 <i>gltA</i>    | RF81-2                                                                                                | <i>B. tribocorum</i> /99%                                     |
|                 | RF-g12 <i>gltA</i>    | RF81-3                                                                                                | <i>B. elizabethae</i> /96%                                    |
|                 | RF-g13 <i>gltA</i>    | RF81-4                                                                                                | <i>B. tribocorum</i> /99%                                     |
|                 | RF-g14 <i>gltA</i>    | RF83-1                                                                                                | <i>B. elizabethae</i> /96%                                    |
|                 | RF-g15 <i>gltA</i>    | RF83-2                                                                                                | <i>B. tribocorum</i> /99%                                     |
|                 | RF-g16 <i>gltA</i>    | RF85-3                                                                                                | <i>Bartonella</i> sp. 1-1C/96%,<br><i>B. rochalimae</i> /95%  |
| Lice            | RL-g1 <i>gltA</i>     | R L4-1, 27-1, 27-2, 35-1 RL35-2, 35-3, 36-1, 59-1                                                     | <i>B. phoceensis</i> /100%                                    |
|                 | RL-g2 <i>gltA</i>     | RL12-1                                                                                                | <i>B. rattimassiliensis</i> /100%                             |
|                 | RL-g3 <i>gltA</i>     | RL81-1                                                                                                | <i>B. tribocorum</i> /100%                                    |
|                 | RL-g4 <i>gltA</i>     | RL82-1                                                                                                | <i>B. rattimassiliensis</i> /99%                              |

\* *gltA* = citrate synthase; BAPGM = *Bartonella* alpha-proteobacteria growth medium.

SUPPLEMENTAL TABLE 2

*Bartonella* species detected in small mammals and fleas and lice collected on these mammals, Taiwan

| Animal no. | Animal species* | Location† | <i>Bartonella</i> spp.                                                     | Flea no. and <i>Bartonella</i> spp.                                                                                               | Louse no. and <i>Bartonella</i> spp.                                   |
|------------|-----------------|-----------|----------------------------------------------------------------------------|-----------------------------------------------------------------------------------------------------------------------------------|------------------------------------------------------------------------|
| R4         | Rn              | CF        | <i>B. rattimassiliensis</i> , <i>B. phoceensis</i>                         | RF4-1 <i>B. tribocorum</i> , RF4-2 <i>B. elizabethae</i>                                                                          | RL4-1 <i>B. phoceensis</i>                                             |
| R5         | Rn              | CF        | <i>B. elizabethae</i>                                                      | RF5-1, 5-3, 5-4, 5-5 <i>B. elizabethae</i> ,<br>RF5-2 <i>B. tribocorum</i>                                                        |                                                                        |
| R6         | Rn              | CF        | <i>B. rattimassiliensis</i> , <i>B. phoceensis</i>                         |                                                                                                                                   |                                                                        |
| R9         | Rr              | CF        | <i>B. queenslandensis</i>                                                  |                                                                                                                                   |                                                                        |
| R11        | Rn              | CF        | <i>B. elizabethae</i>                                                      | RF11-1 <i>B. tribocorum</i> , RF11-2, 11-3<br><i>B. elizabethae</i>                                                               |                                                                        |
| R13        | Rn              | CF        | <i>B. queenslandensis</i>                                                  |                                                                                                                                   |                                                                        |
| R14        | Rn              | CF        | <i>B. queenslandensis</i>                                                  |                                                                                                                                   |                                                                        |
| R19        | Rn              | CF        | <i>B. rattimassiliensis</i>                                                | RF19-1 <i>B. elizabethae</i>                                                                                                      |                                                                        |
| R22        | Sm              | CF        | <i>B. tribocorum</i>                                                       |                                                                                                                                   |                                                                        |
| R27        | Rn              | S         | <i>B. tribocorum</i>                                                       |                                                                                                                                   | RL27-1, 27-2 <i>B. phoceensis</i>                                      |
| R30        | Rn              | CF        | <i>B. elizabethae</i> , <i>B. queenslandensis</i>                          |                                                                                                                                   |                                                                        |
| R35        | Rn              | CF        | <i>B. tribocorum</i> , <i>B. queenslandensis</i> ,<br><i>B. phoceensis</i> |                                                                                                                                   | RL35-1, 35-2, 35-3 <i>B. phoceensis</i><br>RL36-1 <i>B. phoceensis</i> |
| R36        | Rn              | CF        | <i>B. rattimassiliensis</i>                                                |                                                                                                                                   |                                                                        |
| R37        | Sm              | CF        | <i>B. tribocorum</i>                                                       |                                                                                                                                   |                                                                        |
| R38        | Rn              | CF        | <i>B. queenslandensis</i>                                                  | RF38-1 <i>B. elizabethae</i>                                                                                                      |                                                                        |
| R48        | Sm              | SF        | <i>B. tribocorum</i>                                                       |                                                                                                                                   |                                                                        |
| R59        | Rn              | CF        | <i>B. queenslandensis</i>                                                  |                                                                                                                                   | RL59-1 <i>B. phoceensis</i>                                            |
| R64        | Rn              | GF        | <i>B. tribocorum</i>                                                       |                                                                                                                                   |                                                                        |
| R69        | Sm              | CF        | <i>B. tribocorum</i>                                                       |                                                                                                                                   |                                                                        |
| R72        | Rn              | CF        | <i>B. rattimassiliensis</i> , <i>B. phoceensis</i>                         | RF72-1 <i>B. elizabethae</i>                                                                                                      |                                                                        |
| R73        | Rn              | SF        | <i>B. tribocorum</i>                                                       |                                                                                                                                   |                                                                        |
| R75        | Rn              | CF        | <i>B. elizabethae</i>                                                      | RF75-1, 75-5 <i>B. tribocorum</i> , RF75-3<br><i>B. elizabethae</i>                                                               |                                                                        |
| R81        | Rn              | CF        | <i>B. tribocorum</i>                                                       | RF81-1, 81-2, 81-4 <i>B. tribocorum</i> , RF81-3<br><i>B. elizabethae</i>                                                         | RL81-1 <i>B. tribocorum</i>                                            |
| R82        | Rn              | CF        | <i>B. tribocorum</i>                                                       | RF82-1, 82-2, 82-3, 82-4, 82-5 <i>B. tribocorum</i>                                                                               | RL82-1 <i>B. rattimassiliensis</i>                                     |
| R83        | Rn              | CF        | <i>B. tribocorum</i>                                                       | RF83-2, 83-3, 83-4 <i>B. tribocorum</i> , RF83-1<br><i>B. elizabethae</i>                                                         |                                                                        |
| R85        | Rn              | CF        | <i>B. elizabethae</i> , <i>B. tribocorum</i>                               | RF85-1, 85-5 <i>B. tribocorum</i> , RF85-2 <i>B. queenslandensis</i> , RF85-3 <i>Bartonella</i><br>sp. 1-1C, <i>B. rochalimae</i> |                                                                        |

\* Rn = *Rattus norvegicus*; Rr = *Rattus rattus*; Sm = *Suncus murinus*.

† CF = cattle farm; S = university campus; SF = swine farm; GF = goose farm.
